# Supplementary material
Source: bioRxiv or medRxiv preprint supplement (https://medrxiv.org/highwire/filestream/87359/field_highwire_adjunct_files/0/2020.06.25.20133421-1.pdf)
Supplement: Supplementary file [file 2020.06.25.20133421-1.pdf]

## INTERVIEW TOPIC GUIDE

### **Participants' accounts of using technology** (for participants from intervention group only)

*As part of the wider study, you have been having teleconsulting sessions and using the IBDsmart app. However, before we start I was wondering if you wouldn't mind just talking me through the process of consultation as you have been experiencing it?*

- What was your experience of using the app?
  - Has the app been helpful in managing your IBD? How so?
  - What aspects of the app have you found most helpful? What challenges have you encountered while using the app?
- How have you found having teleconsulting sessions?
  - Have the sessions been helpful in managing your IBD? How so?
  - What aspects of teleconsulting have you found most helpful? What challenges have you encountered while taking part in a session?
- Family:
  - How has using the IBD App impacted on your family or those close to you?
  - How has taking part in teleconsulting sessions impacted on your family or those close to you?

### **Participants' experiences of living with IBD** (for everyone)

- You mentioned earlier that you have been living with IBD for \_\_\_ years. Can you remember when you received your diagnosis of IBD? What was it like to be given this diagnosis?
- How do you manage your IBD on a daily basis?
  - What have you found most helpful in managing your condition? What has helped you self-manage your IBD?
  - What challenges have you faced living with IBD? How much does IBD impact on your daily life?
  - How has having IBD impacted on your family?
- Does living rurally have an impact on how you manage your IBD? Please explain.
- How would you describe your experiences with clinicians and other health care providers?
- Based on your experience:
  - what do you think is working well for you when using health care you receive from your GP and the hospital;
  - are there any aspects of health care not working so well for you?
  - if so, how can they be improved?

The Future:

*With all of the developments around technology and how we use it in medicine, in the future there may be opportunities to have more technology associated with the management of IBD, for example, remote consultations which may even avoid people having to travel regularly at all, for regular monitoring.*

- How comfortable do you think you are with using technology?
- If teleconsulting became available in the future, how would you feel about using it?

### **Conclusion**

- Is there anything we haven't spoken about today that you would like to talk to me about before we conclude the interview? Are there any questions that you think I should have asked you and that I should ask other people?
- Thank you for your time and contributions to this project. If you want to contact us for any reason, please don't hesitate. Once today's interview is transcribed, I will contact you for transcript validation. Would that be ok? What is the best way to contact you for this?
